# Supplementary material
Source: HighWire-hosted journal article supplement (https://ajnr-sso.highwirestaging.com/highwire/filestream/114123/field_highwire_adjunct_files/0/0570.pdf)
Supplement: 0570.pdf [file 0570.pdf]

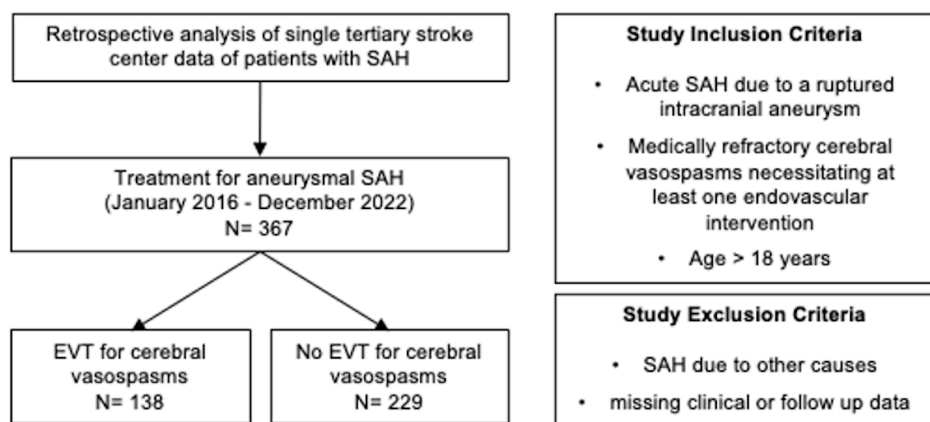

Flowchart of patient inclusion.

|                                          | <b>Study<br/>population</b><br>N=367 | <b>Patients with<br/>endovascular<br/>vasospasm<br/>treatment</b><br>n=138 | <b>Patients<br/>without<br/>endovascular<br/>vasospasm<br/>treatment</b><br>n=229 | <b>P value</b>   |
|------------------------------------------|--------------------------------------|----------------------------------------------------------------------------|-----------------------------------------------------------------------------------|------------------|
| <b>Baseline characteristics</b>          |                                      |                                                                            |                                                                                   |                  |
| ▪ Age (years), mean ( $\pm$ SD)          | 57.1 (13.4)                          | 56.1 (11.7)                                                                | 57.8 (14.2)                                                                       | 0.24             |
| ▪ Female sex, n (%)                      | 241 (65.7%)                          | 93 (67.4%)                                                                 | 148 (64.6%)                                                                       | 0.65             |
| ▪ Diabetes, n (%)                        | 7 (1.9%)                             | 1 (0.7%)                                                                   | 6 (2.6%)                                                                          | 0.26             |
| ▪ Hypertension, n (%)                    | 161 (43.9%)                          | 64 (46.4%)                                                                 | 97 (42.4%)                                                                        | 0.45             |
| ▪ Smoker, n (%)                          | 123 (33.5%)                          | 49 (35.8%)                                                                 | 74 (32.3%)                                                                        | 0.57             |
| <b>Ruptured Aneurysm location, n (%)</b> |                                      |                                                                            |                                                                                   |                  |
| <b>- Anterior circulation</b>            |                                      |                                                                            |                                                                                   |                  |
| ▪ ICA                                    | 86 (23.4%)                           | 33 (23.9%)                                                                 | 53 (23.1%)                                                                        | 0.9              |
| ▪ MCA                                    | 52 (14.2%)                           | 20 (14.5%)                                                                 | 32 (14.0%)                                                                        | 0.88             |
| ▪ ACA                                    | 169 (46%)                            | 62 (44.9%)                                                                 | 107 (46.7%)                                                                       | 0.75             |
| <b>- Posterior circulation</b>           | 60 (16.4%)                           | 23 (16.6%)                                                                 | 37 (16.2%)                                                                        | 0.89             |
| <b>Aneurysm size (median)</b>            | 5 (4-8)                              | 5 (4-8)                                                                    | 5 (4-8)                                                                           | 0.47             |
| <b>Imaging details</b>                   |                                      |                                                                            |                                                                                   |                  |
| ▪ Modified Fisher grade, median (IQR)    | 3 (2-4)                              | 4 (3-4)                                                                    | 3 (2-4)                                                                           | <b>0.005</b>     |
| ▪ ICH baseline, n (%)                    | 115 (31.3%)                          | 58 (42.0%)                                                                 | 57 (24.9%)                                                                        | <b>&lt;0.001</b> |
| ▪ Rebleeding                             | 38 (10.4%)                           | 15 (10.9%)                                                                 | 23 (10.1%)                                                                        | 0.86             |
| ▪ Infarction at discharge, n (%)         | 134 (36.5%), n=354                   | 72 (52.2%), n=131                                                          | 62 (27.8%), n=223                                                                 | <b>&lt;0.001</b> |
| <b>Clinical deficit</b>                  |                                      |                                                                            |                                                                                   |                  |
| ▪ Hunt and Hess grade, median (IQR)      | 3 (2-4)                              | 3 (2-4)                                                                    | 2 (1-4)                                                                           | <b>0.026</b>     |
| <b>Treatment details, n (%)</b>          |                                      |                                                                            |                                                                                   |                  |
| ▪ Surgical clipping                      | 88 (24.0%)                           | 37 (26.8%)                                                                 | 51 (22.3%)                                                                        | 0.38             |
| ▪ EVT                                    | 279 (76.0%)                          | 101 (73.2%)                                                                | 178 (77.7%)                                                                       | 0.38             |
| ▪ EVD                                    | 250 (68.3%)                          | 103 (74.6%)                                                                | 147 (64.2%)                                                                       | <b>0.036</b>     |
| ▪ ASS                                    | 188 (51.2%)                          | 66 (47.8%)                                                                 | 122 (53.3%)                                                                       | 0.33             |
| <b>Outcome</b>                           |                                      |                                                                            |                                                                                   |                  |
| • mRS>2 at follow up                     | 152/354                              | 69/136                                                                     | 83/218                                                                            | <b>0.021</b>     |

|                                    |            |              |            |                  |
|------------------------------------|------------|--------------|------------|------------------|
| • median length of hospitalization | 24 (19-32) | 26.5 (22-34) | 22 (17-30) | <b>&lt;0.001</b> |
| • In-hospital mortality            | 55/367     | 17/138       | 38/229     | 0.29             |

Demographic and clinical parameters of patients with aneurysmal subarachnoid hemorrhage. Boldface type indicates statistically significant values. ASS = acetylsalicylic acid, mRS = modified Rankin Scale, EVD = extraventricular drainage, EVT = endovascular treatment, ICH = intracerebral hemorrhage, ICA = internal carotid artery, MCA = middle cerebral artery, ACA = anterior cerebral artery, Posterior circulation included aneurysms of the basilar artery, the posterior inferior cerebellar artery and the posterior cerebral artery

|                                 |         |            | 95% CI for Odds ratio |        |
|---------------------------------|---------|------------|-----------------------|--------|
|                                 | p-value | Odds ratio | lower                 | upper  |
| Age                             | 0.036   | 1.049      | 1.003                 | 1.097  |
| Sex                             | 0.766   | 1.154      | 0.448                 | 2.973  |
| Aneurysm treatment              | 0.768   | 1.182      | 0.388                 | 3.598  |
| Hunt&Hess                       | <0.001  | 2.118      | 1.384                 | 3.241  |
| ICH at admission                | 0.169   | 1.005      | 0.381                 | 2.651  |
| Necessity of EVD                | 0.993   | 2.533      | 0.673                 | 9.531  |
| Re-Bleeding                     | 0.050   | 4.971      | 1.002                 | 24.647 |
| Bihemispheric vasospasm         | 0.010   | 4.051      | 1.400                 | 11.721 |
| Posterior circulation vasospasm | 0.439   | 1.632      | 0.472                 | 5.645  |
| Onset of vasospasm              | 0.175   | 0.920      | 0.815                 | 1.038  |
| Duration of vasospasm           | 0.094   | 0.830      | 0.668                 | 1.032  |
| Number of treatments            | 0.828   | 1.056      | 0.644                 | 1.733  |
| PTA                             | 0.284   | 2.731      | 0.434                 | 17.120 |

Results of the logistic regression analysis of clinical and procedural variables with follow-up mRS

|                                 |         |            | 95% CI for Odds ratio |        |
|---------------------------------|---------|------------|-----------------------|--------|
|                                 | p-value | Odds ratio | lower                 | upper  |
| Age                             | 0.002   | 1.075      | 1.026                 | 1.126  |
| Sex                             | 0.307   | 0.614      | 0.241                 | 1.564  |
| Aneurysm treatment              | 0.141   | 2.218      | 0.768                 | 6.407  |
| Hunt&Hess                       | 0.880   | 1.028      | 0.714                 | 1.480  |
| ICH at admission                | 0.371   | 0.662      | 0.268                 | 1.635  |
| Necessity of EVD                | 0.467   | 0.641      | 0.193                 | 2.125  |
| Re-Bleeding                     | 0.379   | 0.528      | 0.128                 | 2.188  |
| Bihemispheric vasospasm         | 0.053   | 2.596      | 0.988                 | 6.819  |
| Posterior circulation vasospasm | 0.554   | 0.702      | 0.217                 | 2.268  |
| Onset of vasospasm              | 0.183   | 0.919      | 0.812                 | 1.040  |
| Duration of vasospasm           | 0.387   | 1.089      | 0.898                 | 1.321  |
| Number of treatments            | 0.399   | 1.215      | 0.773                 | 1.911  |
| PTA                             | 0.142   | 3.392      | 0.665                 | 17.290 |

Results of the logistic regression analysis of clinical and procedural variables with new infarctions at discharge

STROBE Statement—Checklist of items that should be included in reports of **cohort studies**

|                           | Item No. | STROBE items                                                                                                                                                                                                                                                                                                                                                                                                                                                                                                                                                                                                                                                                                                                 | Location in manuscript where items are reported                                                                    |
|---------------------------|----------|------------------------------------------------------------------------------------------------------------------------------------------------------------------------------------------------------------------------------------------------------------------------------------------------------------------------------------------------------------------------------------------------------------------------------------------------------------------------------------------------------------------------------------------------------------------------------------------------------------------------------------------------------------------------------------------------------------------------------|--------------------------------------------------------------------------------------------------------------------|
|                           | 1        | (a) Indicate the study's design with a commonly used term in the title or the abstract (b) Provide in the abstract an informative and balanced summary of what was done and what was found                                                                                                                                                                                                                                                                                                                                                                                                                                                                                                                                   | Abstract - Methods                                                                                                 |
| Background rationale      | 2        | Explain the scientific background and rationale for the investigation being reported                                                                                                                                                                                                                                                                                                                                                                                                                                                                                                                                                                                                                                         | Introduction                                                                                                       |
| Objectives                | 3        | State specific objectives, including any prespecified hypotheses                                                                                                                                                                                                                                                                                                                                                                                                                                                                                                                                                                                                                                                             | Introduction                                                                                                       |
| Study Design              | 4        | Present key elements of study design early in the paper                                                                                                                                                                                                                                                                                                                                                                                                                                                                                                                                                                                                                                                                      | Methods                                                                                                            |
| Setting                   | 5        | Describe the setting, locations, and relevant dates, including periods of recruitment, exposure, follow-up, and data collection                                                                                                                                                                                                                                                                                                                                                                                                                                                                                                                                                                                              | Methods                                                                                                            |
| Participants              | 6        | <p>(a) <i>Cohort study</i> - Give the eligibility criteria, and the sources and methods of selection of participants. Describe methods of follow-up</p> <p><i>Case-control study</i> - Give the eligibility criteria, and the sources and methods of case ascertainment and control selection. Give the rationale for the choice of cases and controls</p> <p><i>Cross-sectional study</i> - Give the eligibility criteria, and the sources and methods of selection of participants</p> <p>(b) <i>Cohort study</i> - For matched studies, give matching criteria and number of exposed and unexposed</p> <p><i>Case-control study</i> - For matched studies, give matching criteria and the number of controls per case</p> | <p>Methods</p> <p>NA</p>                                                                                           |
| Variables                 | 7        | Clearly define all outcomes, exposures, predictors, potential confounders, and effect modifiers. Give diagnostic criteria, if applicable.                                                                                                                                                                                                                                                                                                                                                                                                                                                                                                                                                                                    | Methods – Assessed variables & study end points                                                                    |
| Data sources/ measurement | 8        | For each variable of interest, give sources of data and details of methods of assessment (measurement). Describe comparability of assessment methods if there is more than one group                                                                                                                                                                                                                                                                                                                                                                                                                                                                                                                                         | Methods - Patient management, Diagnosis & management of cerebral vasospasms, Assessed variables & study end points |
| Bias                      | 9        | Describe any efforts to address potential sources of bias                                                                                                                                                                                                                                                                                                                                                                                                                                                                                                                                                                                                                                                                    | Discussion                                                                                                         |
| Study size                | 10       | Explain how the study size was arrived at                                                                                                                                                                                                                                                                                                                                                                                                                                                                                                                                                                                                                                                                                    | Methods                                                                                                            |

|                                  |    |                                                                                                                                                                                                                                                                                                                                                                                                                                                                                                                                                                      |                                                                            |
|----------------------------------|----|----------------------------------------------------------------------------------------------------------------------------------------------------------------------------------------------------------------------------------------------------------------------------------------------------------------------------------------------------------------------------------------------------------------------------------------------------------------------------------------------------------------------------------------------------------------------|----------------------------------------------------------------------------|
| Quantitative variables           | 11 | Explain how quantitative variables were handled in the analyses. If applicable, describe which groupings were chosen, and why                                                                                                                                                                                                                                                                                                                                                                                                                                        | Methods - Statistics                                                       |
| Statistical methods              | 12 | (a) Describe all statistical methods, including those used to control for confounding<br>(b) Describe any methods used to examine subgroups and interactions<br>(c) Explain how missing data were addressed<br>(d) <i>Cohort study</i> - If applicable, explain how loss to follow-up was addressed<br><i>Case-control study</i> - If applicable, explain how matching of cases and controls was addressed<br><i>Cross-sectional study</i> - If applicable, describe analytical methods taking account of sampling strategy<br>(e) Describe any sensitivity analyses | Methods - Statistics                                                       |
| Data access and cleaning methods |    | ..                                                                                                                                                                                                                                                                                                                                                                                                                                                                                                                                                                   |                                                                            |
| Linkage                          |    | ..                                                                                                                                                                                                                                                                                                                                                                                                                                                                                                                                                                   |                                                                            |
| Participants                     | 13 | (a) Report the numbers of individuals at each stage of the study (e.g., numbers potentially eligible, examined for eligibility, confirmed eligible, included in the study, completing follow-up, and analysed)<br>(b) Give reasons for non-participation at each stage.<br>(c) Consider use of a flow diagram                                                                                                                                                                                                                                                        | Methods, Supplementary material                                            |
| Descriptive data                 | 14 | (a) Give characteristics of study participants (e.g., demographic, clinical, social) and information on exposures and potential confounders<br>(b) Indicate the number of participants with missing data for each variable of interest<br>(c) <i>Cohort study</i> - summarise follow-up time (e.g., average and total amount)                                                                                                                                                                                                                                        | Results – Patient demographics, see Table 1                                |
| Outcome data                     | 15 | <i>Cohort study</i> - Report numbers of outcome events or summary measures over time<br><i>Case-control study</i> - Report numbers in each exposure category, or summary measures of exposure<br><i>Cross-sectional study</i> - Report numbers of outcome events or summary measures                                                                                                                                                                                                                                                                                 | Results – Patient demographics, see Table 1                                |
| Main results                     | 16 | (a) Give unadjusted estimates and, if applicable, confounder-adjusted estimates and their precision (e.g., 95% confidence interval). Make clear which confounders were adjusted for and why they were included<br>(b) Report category boundaries when continuous variables were categorized                                                                                                                                                                                                                                                                          | Results – Patient demographics, Logistic regression analysis, see Figure 2 |

|                                                           |    |                                                                                                                                                                            |                        |
|-----------------------------------------------------------|----|----------------------------------------------------------------------------------------------------------------------------------------------------------------------------|------------------------|
|                                                           |    | (c) If relevant, consider translating estimates of relative risk into absolute risk for a meaningful time period                                                           |                        |
| Other analyses                                            | 17 | Report other analyses done—e.g., analyses of subgroups and interactions, and sensitivity analyses                                                                          | NA                     |
| Key results                                               | 18 | Summarise key results with reference to study objectives                                                                                                                   | Discussion             |
| Limitations                                               | 19 | Discuss limitations of the study, taking into account sources of potential bias or imprecision. Discuss both direction and magnitude of any potential bias                 | Discussion             |
| Interpretation                                            | 20 | Give a cautious overall interpretation of results considering objectives, limitations, multiplicity of analyses, results from similar studies, and other relevant evidence | Discussion, Conclusion |
| Generalisability                                          | 21 | Discuss the generalisability (external validity) of the study results                                                                                                      | Discussion             |
| Funding                                                   | 22 | Give the source of funding and the role of the funders for the present study and, if applicable, for the original study on which the present article is based              | Funding                |
| Accessibility of protocol, raw data, and programming code |    | ..                                                                                                                                                                         |                        |

## STROBE Checklist
